# Supplementary material for: Systematic In-silico Analysis of Fisetin-Proteins Interactions Revealing the PTGS2 as a Potential Therapeutic Target
Source: Research Square preprint supplement (doi:10.21203/rs.3.rs-7955881/v1), 2025-11-26
Supplement: Supplementary file 1 [file 72c102649957ab58ac57c697.docx]

**Supplementary Table 3** Toxicity profile of Fisetin.

| Classification | Target | Prediction | Probability |
| --- | --- | --- | --- |
| Organ toxicity | Hepatotoxicity | Active | 0.69 |
| Organ toxicity | Neurotoxicity | Active | 0.87 |
| Organ toxicity | Nephrotoxicity | Inactive | 0.90 |
| Organ toxicity | Respiratory toxicity | Active | 0.98 |
| Organ toxicity | Cardiotoxicity | Inactive | 0.77 |
| Toxicity end points | Carcinogenicity | Inactive | 0.62 |
| Toxicity end points | Immunotoxicity | Active | 0.96 |
| Toxicity end points | Mutagenicity | Inactive | 0.97 |
| Toxicity end points | Cytotoxicity | Inactive | 0.93 |
| Toxicity end points | Clinical toxicity | Inactive | 0.56 |
| Toxicity end points | Nutritional toxicity | Inactive | 0.74 |
| Tox21-Nuclear receptor signalling pathways | Aryl hydrocarbon Receptor (AhR) | Inactive | 0.97 |
| Tox21-Nuclear receptor signalling pathways | Androgen Receptor (AR) | Inactive | 0.99 |
| Tox21-Nuclear receptor signalling pathways | Androgen Receptor Ligand Binding Domain (AR-LBD) | Inactive | 0.99 |
| Tox21-Nuclear receptor signalling pathways | Aromatase | Active | 1 |
| Tox21-Nuclear receptor signalling pathways | Estrogen Receptor Alpha (ER) | Active | 0.99 |
| Tox21-Nuclear receptor signalling pathways | Estrogen Receptor Ligand Binding Domain (ER-LBD) | Active | 1 |
| Tox21-Nuclear receptor signalling pathways | Peroxisome Proliferator Activated Receptor Gamma (PPAR-Gamma) | Inactive | 0.99 |
| Tox21-Stress response pathways | Nuclear factor (erythroid-derived 2)-like 2/antioxidant responsive element (nrf2/ARE) | Inactive | 0.88 |
| Tox21-Stress response pathways | Heat shock factor response element (HSE) | Inactive | 0.88 |
| Tox21-Stress response pathways | Mitochondrial Membrane Potential (MMP) | Inactive | 0.70 |
| Tox21-Stress response pathways | Phosphoprotein (Tumor Supressor) p53 | Inactive | 0.96 |
| Tox21-Stress response pathways | ATPase family AAA domain-containing protein 5 (ATAD5) | Inactive | 0.99 |
| Molecular Initiating Events | Thyroid hormone receptor alpha (THRα) | Inactive | 0.55 |
| Molecular Initiating Events | Thyroid hormone receptor beta (THRβ) | Inactive | 0.75 |
| Molecular Initiating Events | Transtyretrin (TTR) | Inactive | 0.75 |
| Molecular Initiating Events | Ryanodine receptor (RYR) | Inactive | 0.93 |
| Molecular Initiating Events | GABA receptor (GABAR) | Inactive | 0.76 |
| Molecular Initiating Events | Glutamate N-methyl-D-aspartate receptor (NMDAR) | Inactive | 0.89 |
| Molecular Initiating Events | alpha-amino-3-hydroxy-5-methyl-4-isoxazolepropionate receptor (AMPAR) | Inactive | 1 |
| Molecular Initiating Events | Kainate receptor (KAR) | Inactive | 1 |
| Molecular Initiating Events | Achetylcholinesterase (AChE) | Active | 0.60 |
| Molecular Initiating Events | Constitutive androstane receptor (CAR) | Inactive | 0.99 |
| Molecular Initiating Events | Pregnane X receptor (PXR) | Inactive | 0.69 |
| Molecular Initiating Events | NADH-quinone oxidoreductase (NADHOX) | Inactive | 0.82 |
| Molecular Initiating Events | Voltage gated sodium channel (VGSC) | Inactive | 0.64 |
| Molecular Initiating Events | Na+/I- symporter (NIS) | Inactive | 0.79 |
| Metabolism | Cytochrome CYP1A2 | Inactive | 0.76 |
| Metabolism | Cytochrome CYP2C19 | Inactive | 0.87 |
| Metabolism | Cytochrome CYP2C9 | Active | 0.56 |
| Metabolism | Cytochrome CYP2D6 | Inactive | 0.63 |
| Metabolism | Cytochrome CYP3A4 | Active | 0.71 |
| Metabolism | Cytochrome CYP2E1 | Inactive | 0.98 |
